# Supplementary material
Source: HighWire-hosted journal article supplement (http://www.jrheum.org/highwire/filestream/31733/field_highwire_adjunct_files/0/160821DataSuppl.pdf)
Supplement: 160821DataSuppl.pdf [file 160821DataSuppl.pdf]

## ONLINE SUPPLEMENTARY DATA

### Scoring form | MRI of the knee in JIA

Patient ID: \_\_\_\_\_ Initials reader: \_\_\_\_\_ Date: \_\_\_\_\_

| Location              | Synovial thickening <sup>a</sup><br><i>JAMRIS</i> |              |           | Synovial thickening <sup>a</sup><br><i>ISPG</i> |                |                |           | Synovial enhancement<br><i>Damasio et al.</i> |           |               |
|-----------------------|---------------------------------------------------|--------------|-----------|-------------------------------------------------|----------------|----------------|-----------|-----------------------------------------------|-----------|---------------|
|                       | 0<br><2mm                                         | 1<br>2 - 4mm | 2<br>>4mm | 0<br>≤1mm                                       | 1<br>>1 - ≤3mm | 2<br>>3 - ≤5mm | 3<br>>5mm | 0<br>None                                     | 1<br>Mild | 2<br>Moderate |
| Suprapatellar         |                                                   |              |           |                                                 |                |                |           |                                               |           |               |
| Retropatellar         |                                                   |              |           |                                                 |                |                |           |                                               |           |               |
| Infrapatellar         |                                                   |              |           |                                                 |                |                |           |                                               |           |               |
| Cruciate ligaments    |                                                   |              |           |                                                 |                |                |           |                                               |           |               |
| Medial post. condyle  |                                                   |              |           |                                                 |                |                |           |                                               |           |               |
| Lateral post. condyle |                                                   |              |           |                                                 |                |                |           |                                               |           |               |

<sup>a</sup> Maximal thickness of the contrast-enhanced synovial membrane (single layer is measured), scored per region

| Location             | Joint effusion <sup>a</sup><br><i>ISPG</i> |                |                 |            | Additional MRI features |              |
|----------------------|--------------------------------------------|----------------|-----------------|------------|-------------------------|--------------|
|                      | 0<br>≤3mm                                  | 1<br>>3 - ≤5mm | 2<br>>5 - ≤10mm | 3<br>>10mm | 0<br>Absent             | 1<br>Present |
| Suprapatellar recess |                                            |                |                 |            |                         |              |
| Retropatellar        |                                            |                |                 |            |                         |              |
| Baker cyst           |                                            |                |                 |            |                         |              |
| Lateral recess       |                                            |                |                 |            |                         |              |
| Posterior recess     |                                            |                |                 |            |                         |              |

| Feature                             | 0<br>Absent | 1<br>Present |
|-------------------------------------|-------------|--------------|
| Infrapatellar fat pad heterogeneity |             |              |
| Tendinopathy                        |             |              |
| Enthesopathy                        |             |              |

<sup>a</sup> Maximal diameter, score of largest pocket counts

| Location                  | Bone marrow changes <sup>a</sup><br>JAMRIS |       |        |      | Cartilage lesions <sup>a</sup><br>JAMRIS |       |        |      | Bone erosions <sup>a</sup><br>JAMRIS |       |        |      |
|---------------------------|--------------------------------------------|-------|--------|------|------------------------------------------|-------|--------|------|--------------------------------------|-------|--------|------|
|                           | 0                                          | 1     | 2      | 3    | 0                                        | 1     | 2      | 3    | 0                                    | 1     | 2      | 3    |
|                           | None                                       | 0-10% | 10-25% | ≥25% | None                                     | 0-10% | 10-25% | ≥25% | None                                 | 0-10% | 10-25% | ≥25% |
| Med. patella              |                                            |       |        |      |                                          |       |        |      |                                      |       |        |      |
| Lat. patella              |                                            |       |        |      |                                          |       |        |      |                                      |       |        |      |
| Med. femur condyle        |                                            |       |        |      |                                          |       |        |      |                                      |       |        |      |
| Lat. femur condyle        |                                            |       |        |      |                                          |       |        |      |                                      |       |        |      |
| Med. weight-bearing femur |                                            |       |        |      |                                          |       |        |      |                                      |       |        |      |
| Lat. weight-bearing femur |                                            |       |        |      |                                          |       |        |      |                                      |       |        |      |
| Med. tibial plateau       |                                            |       |        |      |                                          |       |        |      |                                      |       |        |      |
| Lat. tibial plateau       |                                            |       |        |      |                                          |       |        |      |                                      |       |        |      |

<sup>a</sup> Percentage of involved bone / cartilage volume, scored per region

| Cartilage lesions <sup>a</sup><br>IPSG |          |                  |                     |                                     | Bone erosions <sup>a</sup><br>IPSG |                     |                 | Subchondral cysts <sup>a</sup><br>IPSG |                   |                               |
|----------------------------------------|----------|------------------|---------------------|-------------------------------------|------------------------------------|---------------------|-----------------|----------------------------------------|-------------------|-------------------------------|
| 0                                      | 1        | 2                | 3                   | 4                                   | 0                                  | 1                   | 2               | 0                                      | 1                 | 2                             |
| None                                   | Any loss | >50% volume loss | Full thickness loss | Full thickness loss >50% of surface | None                               | Any surface erosion | >50% of surface | None                                   | At least one cyst | In >1 bone or >33% of surface |
|                                        |          |                  |                     |                                     |                                    |                     |                 |                                        |                   |                               |

<sup>a</sup> Maximal score anywhere in the knee
